# Supplementary material for: Kinetic and equilibrium studies on the polyazamacrocycle neotetren: metal–complex formation and DNA interaction
Source: Royal Society of Chemistry journal article supplement (doi:10.1039/b512820j), 2005-12-09

## Supporting material

- 1S.** Binding isotherm for 1:1 Cu(II)/Neotetren complex formation.  $C_L = 3 \times 10^{-5}$  M. pH = 0.52, I = 0.5M (NaCl),  $\lambda = 300$  nm, T = 25°C.
- 2S.** Binding isotherm for 2:1 Cu(II)/Neotetren complex formation.  $C_L = 3 \times 10^{-5}$  M. pH = 3.5, I = 0.5M (NaCl),  $\lambda = 300$  nm, T = 25°C. The continuous line shows the trend calculated if the 1:1 complex, instead of 2:1 complex, should have formed.
- 3S.** Spectrophotometric titrations fit for 1:1 Cu(II)/Neotetren complex formation;  $C_L = 3 \times 10^{-5}$  M, pH = 0.52, I = 0.5 M (NaCl),  $\lambda = 300$  nm, T = 25°C, fit of the data to Eq. (1).
- 4S.** Spectrophotometric titrations fit for 2:1 Cu(II)/Neotetren complex formation;  $C_L = 3 \times 10^{-5}$  M, pH = 3.5, I = 0.5 M (NaCl),  $\lambda = 300$  nm, T = 25°C, fit of the data to Eq. (2); the deviations at low Cu(II) load indicate the presence of the 1:1 complex.
- 5S.** Stopped flow curve for 1:1 Cu(II)/Neotetren complex formation;  $C_L = 1.0 \times 10^{-5}$  M,  $C_{Cu} = 1.0 \times 10^{-3}$  M, pH = 1.15, I = 0.5M (NaCl),  $\lambda = 300$  nm, T = 25°C.
- 6S.** Stopped flow curve for 2:1 Cu(II)/Neotetren complex formation;  $C_L = 1.5 \times 10^{-6}$  M,  $C_{Cu} = 5 \times 10^{-5}$  M, pH = 3.00, I = 0.5M (NaCl),  $\lambda = 300$  nm, T = 25°C.
- 7S.** Difference spectrophotometric titration (DNA added in both reference and sample cuvettes) of the CuNeotetren/DNA system; top)  $C_D = 1.5 \times 10^{-5}$  M,  $C_P = 0$  M; bottom)  $C_D = 1.5 \times 10^{-5}$  M,  $C_P = 1.5 \times 10^{-4}$  M. I = 0.11 M, T = 25°C, pH = 7.0.
- 8S.** Scatchard plot for the CuNeotetren/DNA system.  $C_D = 1.5 \times 10^{-5}$  M,  $C_P = (0 \div 1.5) \times 10^{-4}$  M, I = 0.11M, pH = 7.0,  $\lambda = 275$  nm, T = 25°C. The titration variable is  $r = [DS]/C_P$ , being  $C_P$  the total DNA concentration and  $[DS] = (A - A_0)/\Delta\epsilon$  with  $\Delta\epsilon = \epsilon_{DS} - \epsilon_D$  first estimated from the amplitude of the titration curve.
- 9S.** Scatchard plot for the CuNeotetren/DNA system.  $C_D = 1.5 \times 10^{-5}$  M,  $C_P = (0 \div 1.5) \times 10^{-4}$  M, I = 0.025M, pH = 7.0,  $\lambda = 275$  nm, T = 25°C.

**10S.** Stopped flow curve for the CuNeotetren/DNA system.  $C_D = 1.5 \times 10^{-6}$  M,  $C_{DNA} = 3.5 \times 10^{-5}$  M,  
I = 0.11 M, T = 25°C, pH = 7.0,  $\lambda = 275$  nm.

**11S.** Stopped flow curve for the Cu<sub>2</sub>Neotetren/DNA system.  $C_D = 1.5 \times 10^{-6}$  M,  $C_{DNA} = 3.5 \times 10^{-5}$   
M, I = 0.71 M, T = 25°C, pH = 7.0,  $\lambda = 275$ nm.

Figure 1S

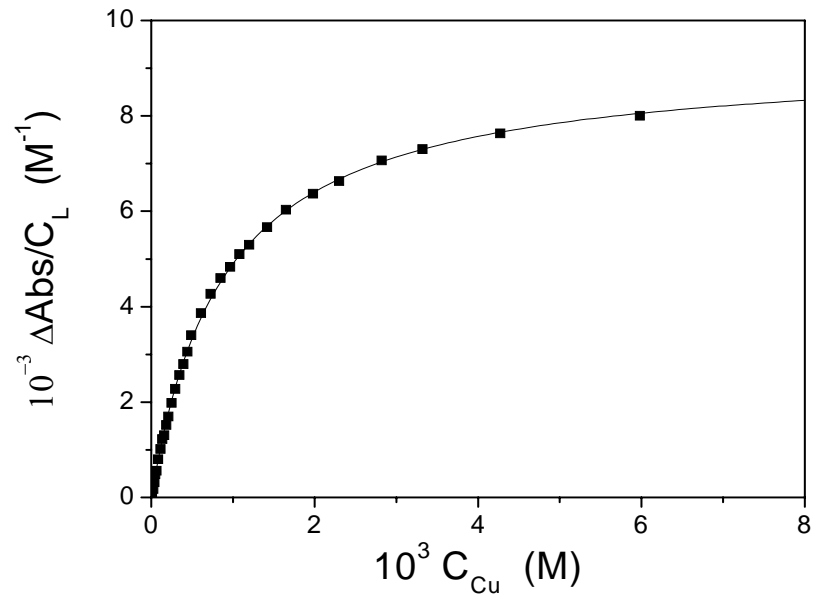

Figure 2S

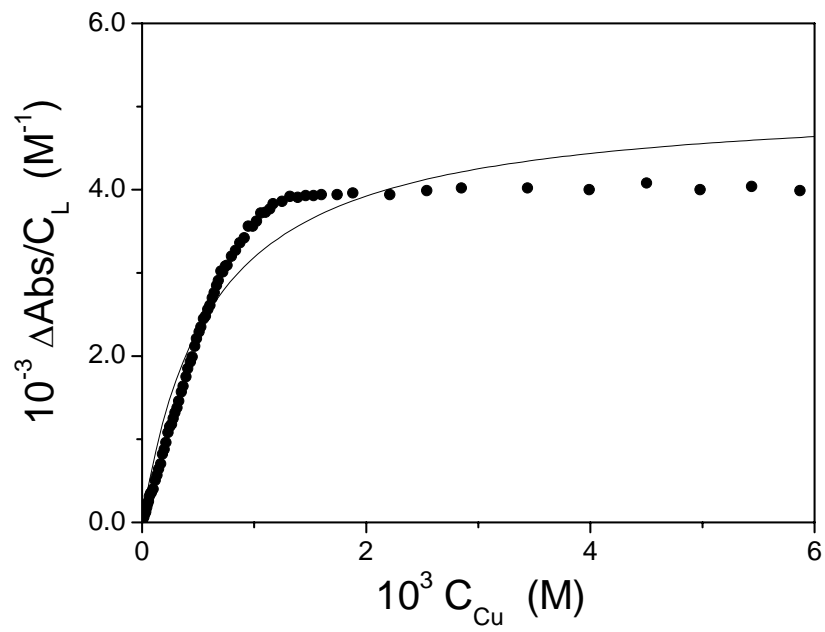

Figure 3S

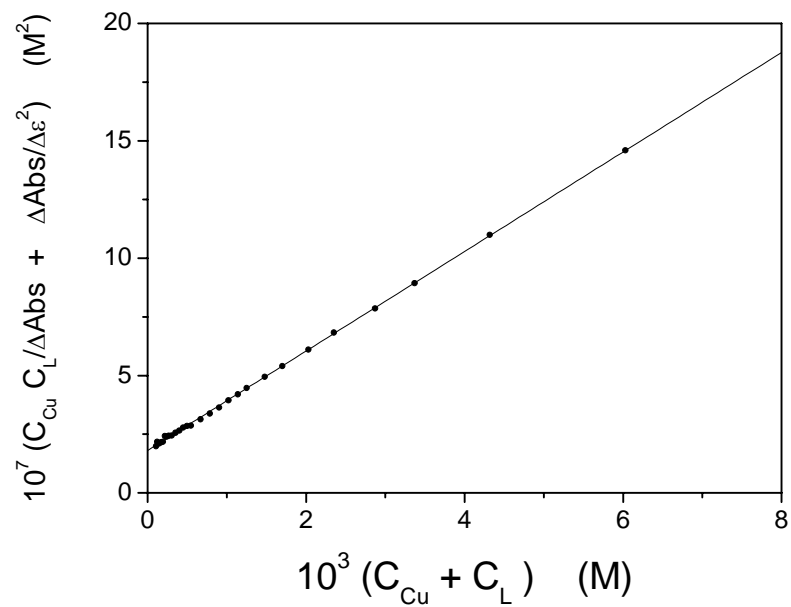

Figure 4S

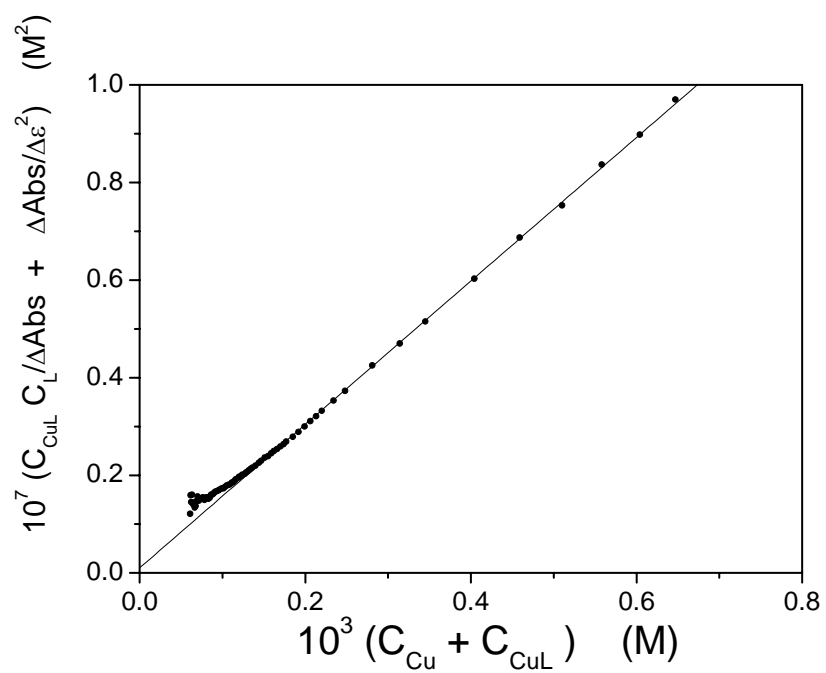

Figure 5S

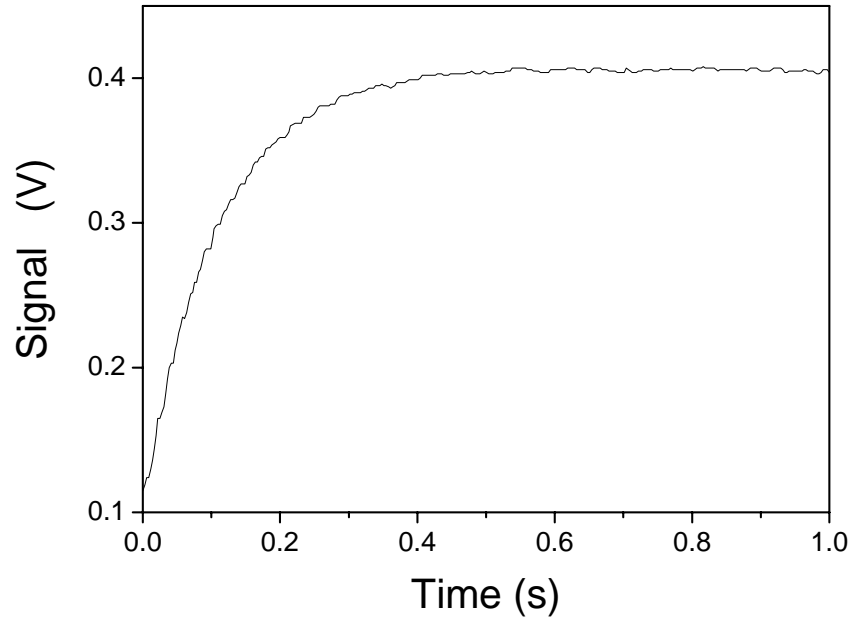

Figure 6S

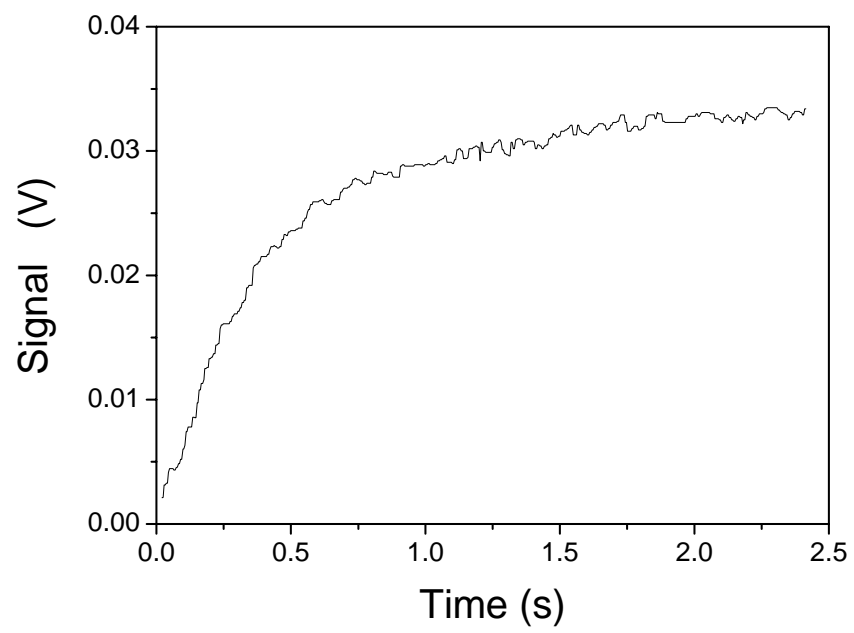

Figure 7S

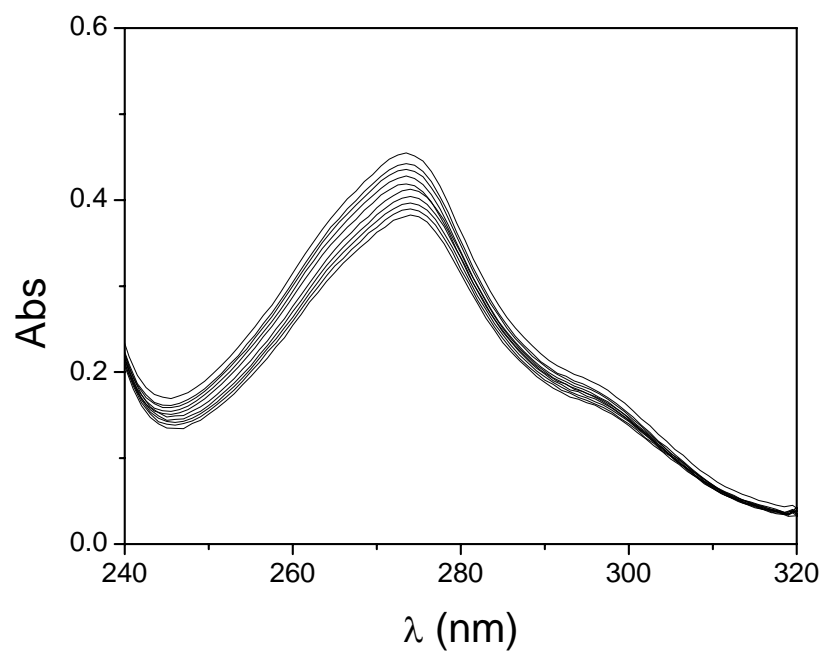

Figure 8S

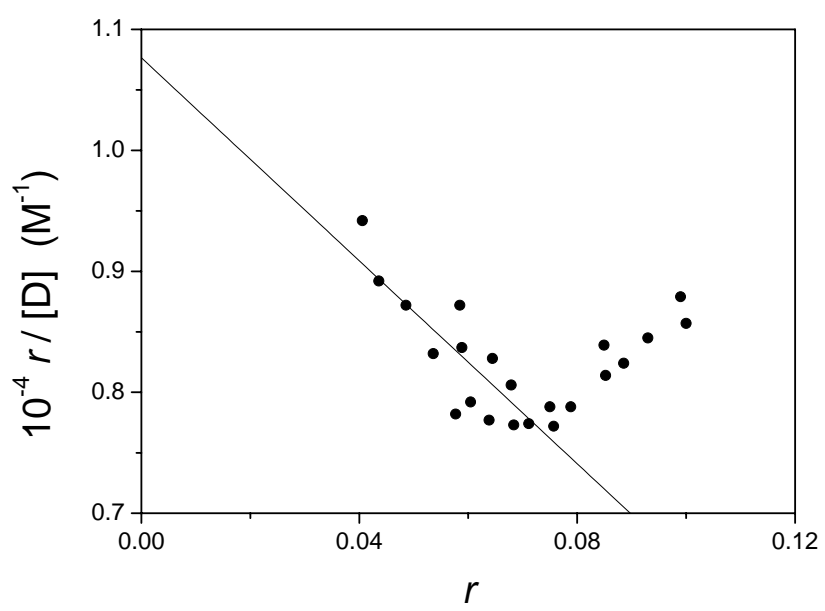

Figure 9S

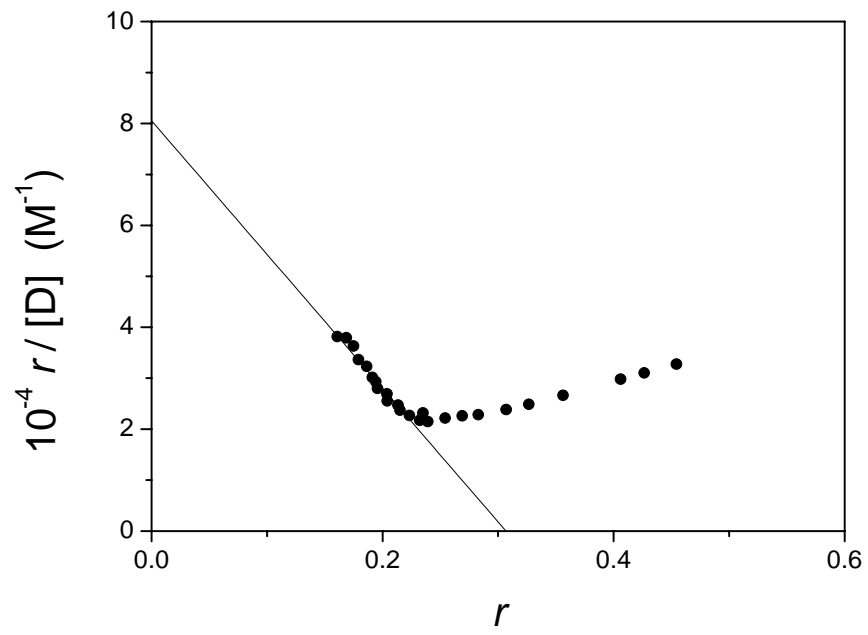

Figure 10S

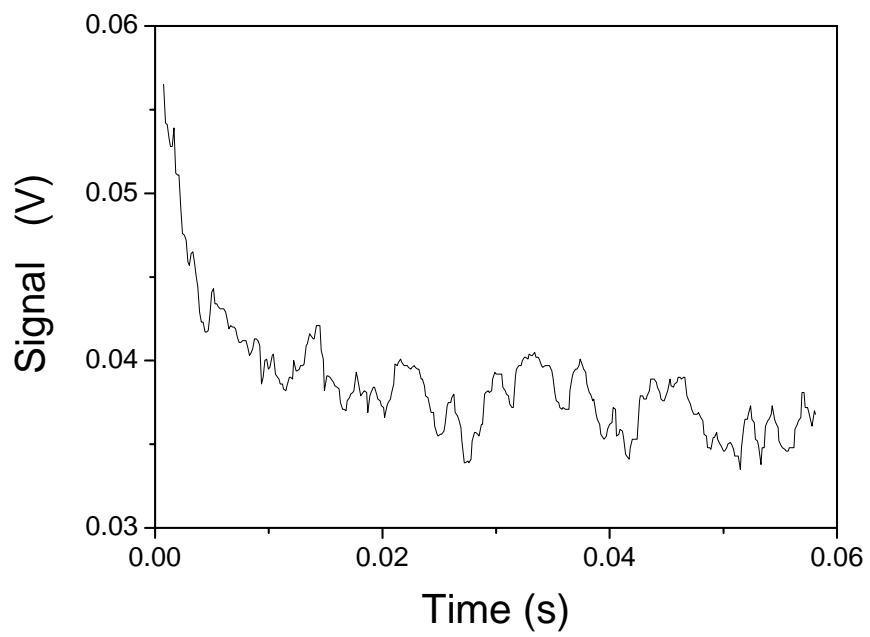

Figure 11S

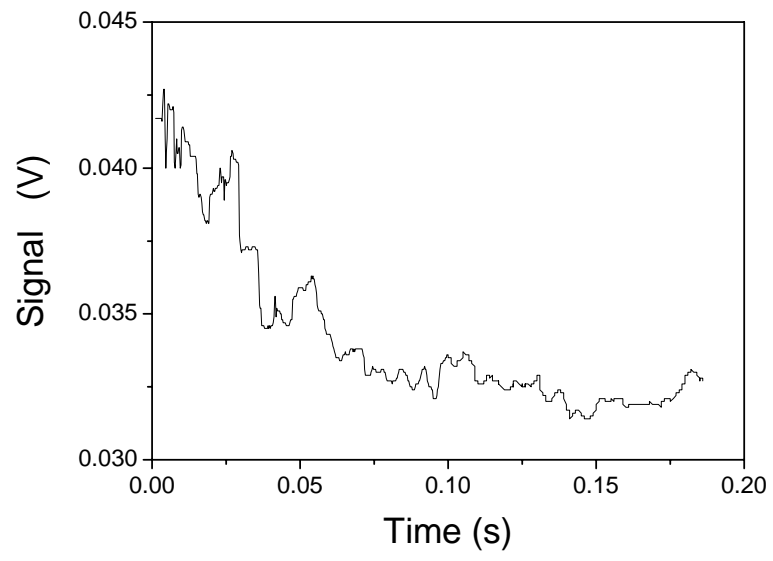

Supplement: b512820j.pdf [file b512820j.pdf]
